1 **Age-dependent effects of reduced mTor signalling on life expectancy through**  
2 **distinct physiology**

3

4 Mirre J P Simons<sup>1</sup>, Laura Hartshorne<sup>1</sup>, Suzan Trooster<sup>1</sup>, Jessica Thomson<sup>1</sup>, Marc  
5 Tatar<sup>2</sup>

6

7 <sup>1</sup> Department of Animal and Plant Sciences, University of Sheffield, Sheffield, S10  
8 2TN, UK

9 <sup>2</sup> Department of Ecology and Evolutionary Biology, Brown University, Providence, RI,  
10 USA.

11

12 **Abstract**

13 Research on the mechanisms of ageing has identified ways via which lifespan can  
14 be extended in model organisms, increasing the potential for translation of these  
15 findings to our own species. However, the large majority of research on animal  
16 models involves dietary, genetic or pharmacological treatments throughout life –  
17 limiting translational potential and ignoring age-dependent effects. Previously, we  
18 have suggested using demographic meta-analysis that reduced mTor signalling has  
19 the potential to instantly rejuvenate. We have now tested this prediction  
20 experimentally using large-scale demographic data (N > 10,000) combined with  
21 conditional knockdown of mTor in *Drosophila melanogaster*. Indeed, reduced mTor  
22 decreased mortality rate when applied during old age. Interestingly, we found that  
23 transient treatment during early adult life had long-lasting benefits. Age-dependent  
24 deep-RNAseq indicated that these effects arose from distinct physiology and  
25 implicate alternative splicing as a potential mechanism for the long-lasting benefits of  
26 transient mTor reduction. These findings suggest that reducing mTor short term or  
27 during old age could be used to combat ageing. In addition, our findings suggest that  
28 the results from experimental research on mTor signalling, and potentially other  
29 mechanisms of ageing, that employ life-long interventions are likely to be a complex  
30 composite of age-dependent effects that counteract or enhance each other.

## 31 Introduction

32 The biology of ageing field has progressed our understanding of mechanisms and  
33 interventions that can extend health- and lifespan. The most potent and researched  
34 of these are dietary restriction<sup>1-3</sup> and reducing mTor (mechanistic Target of  
35 Rapamycin) signalling<sup>4-6</sup>. These interventions we now (only) partially understand and  
36 there is a growing wish and reality for translation to our own species<sup>7</sup>. A key factor  
37 that hinders the translation of these findings to humans is however that the large  
38 majority of the experiments in animal models are carried out for their entire lifetimes,  
39 which begs the question whether long-term treatment will be required in humans as  
40 well. Any long-term treatment will be hard to apply in our own species and close to  
41 impossible to study in clinical trials. More immediate benefits to health- and lifespan  
42 are sought for to hold translational promise<sup>8,9</sup>. Notably, dietary restriction can have  
43 instant benefits on health indicators<sup>2,10</sup>, but trials in humans have only been  
44 conducted over a relatively short timespan<sup>10,11</sup>. Animal experiments have shown that  
45 in terms of longevity, mortality risk is instantly modulated by diet in flies<sup>12-14</sup>, but  
46 experiments in other organisms, namely rodents suggest late-life treatment is not  
47 necessarily pro-longevity<sup>15,16</sup>. In contrast, short-term energy restriction in early life  
48 can result in long-lasting health benefits, as for example in mice by restricting milk  
49 access<sup>17</sup>.

50

51 Reduced mTor signalling has now also been suggested to improve life expectancy  
52 after short-term treatment or in old animals. Rapamycin treatment from 600 days of  
53 age onwards resulted in longevity benefits (especially in females, as control biased  
54 mortality occurred prior to drug treatment in males)<sup>9</sup>. Recently, short term transient  
55 rapamycin treatment (of 3 months) of mice aged 2 years led to a lifespan extension,  
56 but the authors acknowledge sample size for this study is limited<sup>18</sup>. We have recently  
57 also argued using demographic meta-analysis across four model species that  
58 reducing mTor signalling at old age could reduce mortality risk<sup>4</sup>. Such inference from  
59 demographic models can be informative<sup>4,15,16,19,20</sup>, but only by testing different ages  
60 of manipulation can such demographic patterns be tested for causality<sup>8,12,13,21</sup>. Here,  
61 we present the first of such comprehensive evidence using large-scale demography  
62 comprising over 10,000 individual flies (*Drosophila melanogaster*), showing that  
63 reduction of mTor in late life results in instant benefits on life expectancy. In addition,  
64 we find that short transient mTor knockdown during early adulthood has long-lasting

65 benefits reducing mortality in late life even when mTor levels are back to  
66 unmanipulated levels. Age-dependent RNAseq data from this experiment showed  
67 that these two effects originate from differential physiology, potentially derived from  
68 differences in alternative splicing.

69

## 70 **Results and discussion**

### 71 **Experimental design and GeneSwitch kinetics**

72 Age-dependent knockdown of mTor (using *in vivo* RNAi<sup>22</sup>) was achieved using the  
73 well-established conditional GeneSwitch system<sup>23,24</sup>, by feeding adult flies  
74 mifepristone (RU486). We chose RNAi over rapamycin treatment as genetic  
75 suppression of mTor signalling results in larger effects<sup>4</sup> and more potent rapalogs  
76 are currently being developed<sup>25</sup>. The ligand RU486 for GeneSwitch allows close  
77 experimental control of downstream genetic tools. Our experimental design  
78 consisted of four groups. A transient treatment with flies fed food containing RU486  
79 for 12 days during early adult life (starting at age 15±1), a late life group fed RU486  
80 after this timepoint (starting at 27 d old), and two additional groups either fed RU486  
81 from age 15 d until death ('whole life') or fed control food (control, see methods and  
82 Figure 1). This age-dependent treatment regime was chosen based on an initial  
83 experiment measuring age-specific mortality in response to whole life mTor  
84 knockdown, as well as a lower sample size experiment that showed mTor  
85 knockdown in late life reduced mortality (both unpublished).

86

87 Control experiments confirmed there were no age-dependent changes in the  
88 inducibility of the GeneSwitch system (e.g. due to differential feeding or metabolism  
89 of RU486) and determined the kinetics of GeneSwitch induction and termination  
90 upon RU feeding. With *daughterless* GeneSwitch (*da*-GS, expressed in the whole  
91 fly)<sup>23</sup> crossed to overexpression constructs of *hid* and *reaper* (inducers of cell  
92 death<sup>26</sup>), we drove and measured the corresponding impact on death relative to RU  
93 feeding. Irrespective of age of induction, mortality started to rise after about 2-4 days  
94 after initial RU feeding, reached maximum induction after 12 days of RU feeding, and  
95 returned to control levels after about 12 day once RU feeding was terminated (Figure  
96 2A, P < 0.0001, N = 3,287). These RU induction dynamics were used to interpret the  
97 kinetic effects of mTor knockdown on mortality and transcriptional profiles (Figure 1).

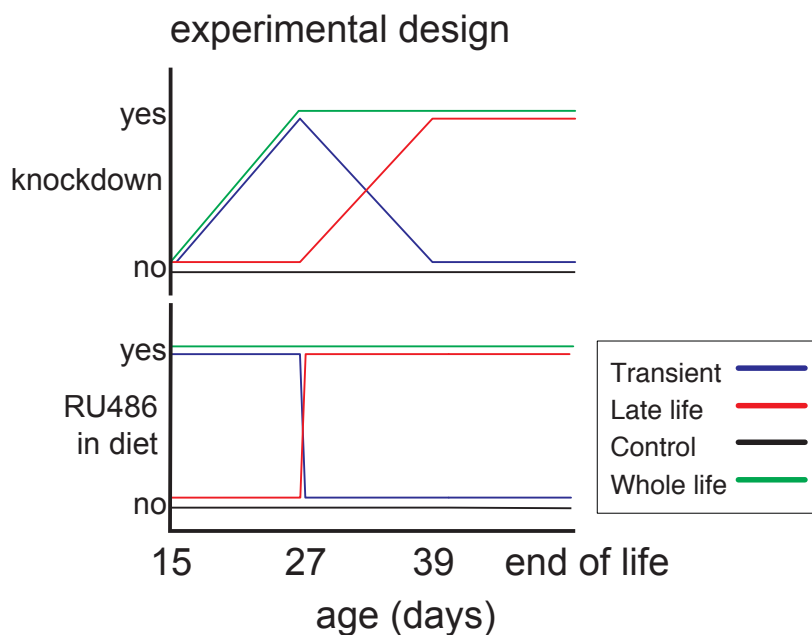

98

99 **Figure 1.** Experimental design. RU486 is fed in an age-dependent manner. Knockdown of mTor is will  
100 follow up to maximum induction which is reached after 12 days (Figure 2A). Temporal dynamics of  
101 knockdown induction is drawn as linear but could follow other dynamics. Key for interpretation of both  
102 mortality and RNAseq data, below, is that maximum response in mortality and associated  
103 physiological changes is expected at age 27 and 39.

104

### 105 **Negative Control**

106 Although no confounding effects of RU486 on mortality have been reported in similar  
107 experiments<sup>23,27-30</sup> we conducted negative controls to exclude any such effects. The  
108 *da-GS* driver line was crossed to a genetic control from the TRiP collection that  
109 included the insertion vector without shRNA. Offspring of this cross were studied  
110 directly alongside the kinetic control and age-dependent knockdown experiments.  
111 When RU486 was applied in the same regime as all induction experiments, no  
112 difference in mortality was seen among any treatment (Figure 2B,  $P > 0.56$ ,  $N =$   
113 4,708).

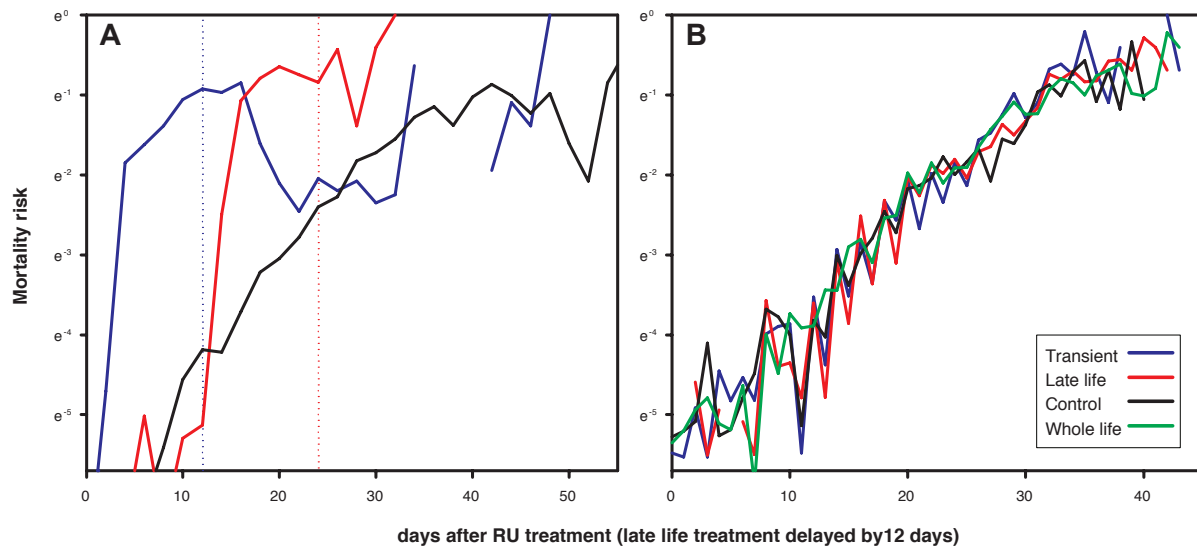

114

115 **Figure 2.** Raw mortality data **A)** *da*-GS (whole fly expression) driving overexpression of *hid* and *rpr*

116 conditionally induced death in the fly, and such induction was reversible in the transient treatment.

117 After the start of RU486 feeding it takes 12 days for full induction of mortality and this drops back to

118 normal levels after removal of RU (see Figure 1 for experimental design). Note control mortality is

119 similar to controls in panel B, suggesting *da*-GS does not cause any leaky expression, i.e.

120 overexpression of *hid* or *reaper* in the absence of RU486. **B)** Negative control: *da*-GS crossed to a

121 TRiP control line (as dTor knockdown, see below, uses TRiP). In none of the timing regimes did

122 RU486 have any effect on mortality ( $P > 0.56$ ), as also reported previously in other studies.

123

### 124 **Age-dependent effects of mTor knockdown on mortality**

125 Knockdown of mTor at old age instantly decreased mortality (Figure 3A, Hazard rate

126 (exp) =  $0.65 \pm 0.06$ ,  $P < 0.0001$ ). Continuous knockdown and transient knockdown of

127 mTor produced similar mortality trajectories where death rate initially increased

128 relative to control but then reduced to a level below that of the control for the

129 remainder of the trial (Figure 3B, Hazard rate (exp) =  $0.41\text{--}0.43 \pm 0.06$ ,  $P < 0.0001$ ).

130 Because early mortality was induced by mTor knockdown, we evaluated if

131 subsequent lifespan extension could be explained by demographic selection acting

132 on phenotypic heterogeneity for frailty. If the frailest flies were killed by the initial

133 induction of mTor RNAi, mortality measured in the remaining cohort could be

134 reduced by the early loss of this frail subset. To determine if demographic selection

135 accounts for our observed late-life mortality pattern, we generated simulated life

136 tables under an assumption that the excess deaths introduced in early life ( $N = 329$ )

137 upon induction of mTor RNAi did not act on frailty variation. We simulated life tables

138 beginning at age 39 that now included the 329 individuals that were lost before age

139 33 days old (as compared to control) in the observed data by uniformly sampling and

140 reintroduced simulated deaths across this age-interval (ages 39 to 64 days). Note  
141 that because mortality increases exponentially, uniform sampling actually biases  
142 mortality towards earlier ages and thus simulates the bias induced by phenotypic  
143 heterogeneity in frailty. Subsequently we gradually moved and shortened the interval  
144 of reintroduction of simulated deaths to earlier ages in subsequent simulations,  
145 iteratively increasing demographic selection up to a maximum of all deaths  
146 reintroduced at age 39 days. Across all these simulated scenarios, mortality at late  
147 ages continued to be significantly reduced in the treatments with early and  
148 continuous mTor RNAi ( $P < 0.0001$ ). Thus, transient knockdown of mTor during early  
149 life appears to reduce later mortality through long-lasting physiological effects.  
150  
151  
152  
153

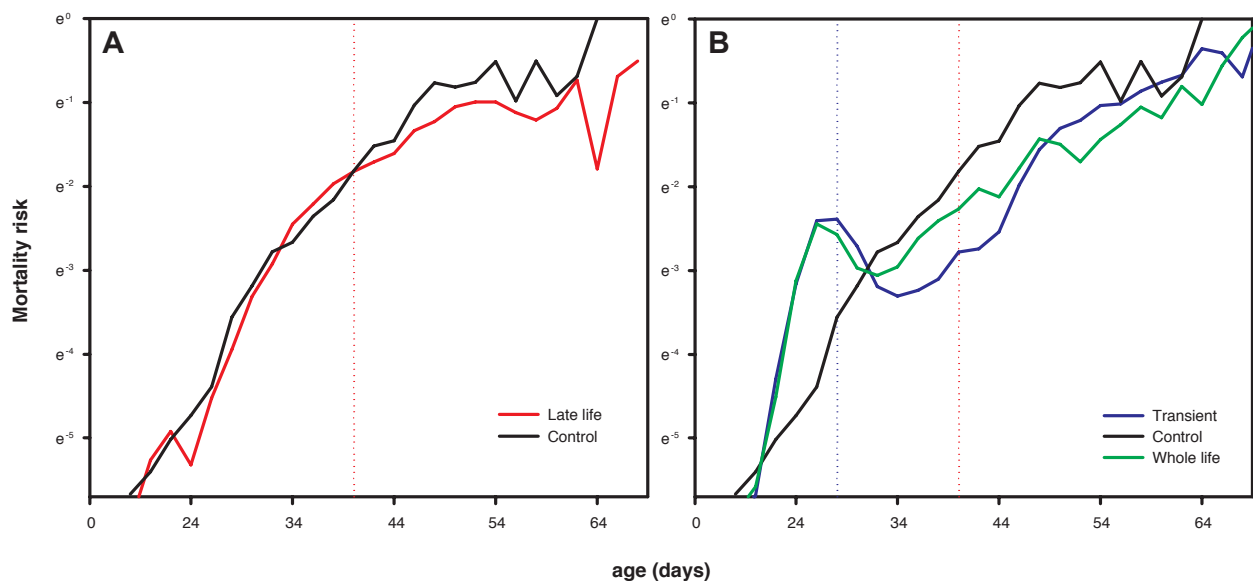

154  
155 **Figure 3.** Raw mortality risk plotted on a natural log axis. **A)** Mortality risk is lowered when mTor is  
156 knocked down in late life ( $P < 0.0001$ ). The red dotted line indicates when *da*-GeneSwitch is  
157 maximally inducing *in vivo* RNAi to knockdown mTor. Data analysed using age-dependent mixed  
158 effects cox proportional hazard models correcting for cage effects (see methods<sup>14,31</sup>). **B)** Transient  
159 mTor knockdown (maximum induction of GeneSwitch at blue dotted line) resulted in a modest  
160 increase in mortality during early life, but subsequently resulted in a sustained mortality reduction  
161 throughout life ( $P < 0.0001$ ). Similar effects were seen when mTor was knocked down continuously.  
162 The red dotted line now indicated when mTor in the transient treatment is back to control levels.  
163 These experiments were all ran together at the same time but are split in two panels for graphical  
164 purposes.

165

166 **Transcriptomes of age-dependent mTor knockdown suggests distinct**  
167 **physiological responses to early and late induction**

168 Conditional knockdown of mTor impacts whole fly mRNA profiles with immediate,  
169 reversible and long-lasting changes (Figure 4). Notably, transient mTor reduction  
170 induced long-lasting changes in the transcriptome that are distinct from late and  
171 whole-life mTor reduction. We used a combined statistical framework (see methods)  
172 to distil transcriptional changes that are uniquely associated with the different age-  
173 dependent treatment regimes of mTor RNAi (Figure 1). We plotted these effects on  
174 the KEGG mTor network to visualize these differences. Knockdown of mTor in late  
175 life produced only a limited response across the whole network, whereas transient  
176 knockdown in early life induced persistent, substantial differential expressed across  
177 the network even though mTor expression was back at control levels (Figure S1).

178 In the early, transient mTor knockdown cohort, over 6,000 of 10,187 identified  
179 transcripts were statistically differentially expressed when compared at old age  
180 (model comparison second sampling point at 39 days old, after false-discovery rate  
181 Benjamini-Hochberg correction) (Figure 5). Continuous knockdown resulted in over  
182 2,000 differentially expressed genes, whereas late life knockdown resulted in limited  
183 differential transcription of around 700 genes. Note, that the comparisons of interest  
184 statistically identified here are the additional contribution of the timing of mTor  
185 knockdown (early versus late) on top of any effects of whole life knockdown  
186 compared to control (for statistical framework see methods). Remarkably, there was  
187 only limited overlap in altered transcripts among the treatment categories suggesting  
188 the age-dependent effects of mTor knockdown were distinct rather than additive  
189 (Figure 5).

190

191

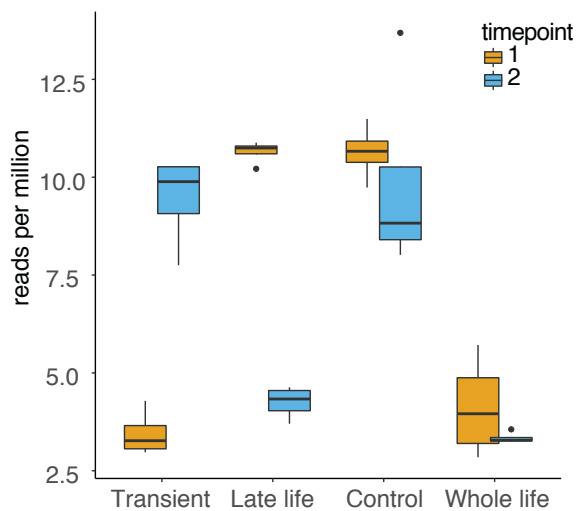

192

193 **Figure 4.** mTor was transiently knocked down, most notably to similar levels in the different treatment  
 194 categories ( $F_{3,24} = 37.3$ ,  $P < 0.0001$ ). Blue boxplots indicate the level of mTor expression in RNA from  
 195 whole flies collected at late life induction (corresponding to red dotted line Figure 3A, see Figure 1).  
 196 Orange boxplots indicate the same but for early life maximal induction (corresponding to blue line  
 197 Figure 3B). Transient treatments resulted in immediate experimental changes in transcription in mTor  
 198 as intended and transient treatment at the respective timepoints where statistically indistinguishable  
 199 from continuous treatments ( $P > 0.26$ ).

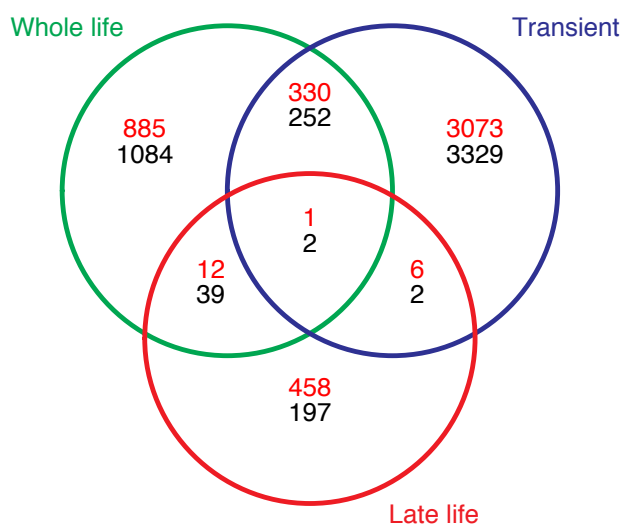

200

201 **Figure 5.** Venn diagram of differentially expressed genes, following false discovery rate correction,  
 202 compared to the control treatment. Numbers in red are downregulated, black are upregulated,  
 203 compared to control conditions. Note there is limited overlap between categories suggesting that  
 204 differences in the transcriptome induced by age-dependent mTor reduction, compared to control, are  
 205 not additive between treatments, but distinct.



206 **Age-dependent reduction of mTor signalling implicates different physiology**

207 We performed directional KEGG and GO enrichment analyses<sup>32</sup> to provide a  
208 generalised view of physiological changes between the transcriptional responses  
209 across the three distinct timings of mTor knockdown compared to control (Tables S1-  
210 S6). Divergent processes were associated with each of the three timing regimes of  
211 mTor reduction.

212

213 Whole life mTor reduction was associated with upregulated sugar-based metabolism  
214 and amino-acid metabolism (Table S1). In contrast to previous studies where mTor  
215 suppression upregulates protein processing and the proteasome<sup>33,34</sup>, reduced mTor  
216 here downregulated these protein degradation pathways. Variation in temporal  
217 dynamics may explain these differences: when the cell is starved it will activate  
218 autophagy and protein degradation related mechanisms, but once excess proteins  
219 are recycled, the resultant effect is a downregulation of the protein recycling  
220 machinery and a shift in total metabolism. The conclusion of the effects of reduced  
221 mTor signalling on protein processing and the proteasome might therefore depend  
222 on the timing after which this is measured and may depend on the system in which  
223 this is studied: cell culture versus whole organism, but this interpretation will require  
224 future testing. In line with the interpretation that metabolism is downregulated when  
225 mTor is reduced for a prolonged time is that DNA replication and RNA transport are  
226 downregulated (Table S1).

227 In contrast to continuous mTor knockdown, transient depletion of mTor in early adult  
228 life upregulated cellular activity at terms representing DNA replication, RNA transport  
229 and basal transcription factors, and for ubiquitin mediated proteolysis at old age.  
230 Lysosome-associated terms are downregulated as are as elements for metabolism,  
231 mainly related to fats (Table S2). We find terms for the spliceosome are widely  
232 upregulated, which may explain why transient mTor knockdown has systemic long-  
233 term effects on mortality rate and gene expression (Table S2). Notably, work with *C.*  
234 *elegans* recently suggests that splicing regulation is a potential key mediator of  
235 ageing during dietary restriction and by control of mTor<sup>35-38</sup>. We detected limited  
236 KEGG enrichment with genes uniquely differentially expressed in the late life mTor  
237 knockdown regime suggesting these effects are similar to knockdown of mTor  
238 throughout life. Of note, is the partial downregulation of the spliceosome (15 out of

239 115 genes in this category, Table S3) compared to upregulation in the transient  
240 mTor knockdown treatment (84 out of 115). These interpretations based on KEGG  
241 were likewise seen in GO analysis, although at lower resolution (Tables S4-S6).

### 242 **Alternative splicing**

243 Noting that the spliceosome was upregulated in the transient mTor group, we  
244 analysed the RNAseq data set for alternative splicing using exon-level based reads.  
245 In the transient mTor knockdown group, 327 genes were significantly differentially  
246 spliced, compared to 17 of continuous mTor knockdown and 4 specific to mTor  
247 knockdown in late life. KEGG analysis in the transient mTor knockdown group were  
248 enriched for differentially spliced variants associated with endocytosis<sup>39</sup>, the  
249 lysosome<sup>40</sup>, Hippo signalling (potentially mediating longevity through autophagy<sup>41</sup>  
250 and FOXO<sup>42</sup>) and mTor signalling itself (Table S7). Thus, potentially the long-lasting  
251 mortality benefits from transient mTor reduction are mediated by long-lasting  
252 changes in alternative splicing, as predicted from the upregulation of the  
253 spliceosome<sup>43</sup>.

254

255

### 256 **Conclusion**

257 Short-term treatments that extend lifespan will be key to translate findings from the  
258 field of ageing biology to actual medical applications. These experiments provide the  
259 evidence, together with earlier findings from late-life and transient treatment with  
260 rapamycin (inhibitor of mTor) in mice<sup>9,18</sup>, that short-term or timed suppression of  
261 mTor signalling can have beneficial effects on life/health-span<sup>4</sup> – a treatment regime  
262 that might be practical for humans. While the magnitude of reduced mortality  
263 produced by mTor inhibition are less than those we report for diet restriction in  
264 *Drosophila*<sup>1,13</sup>, they are large relative to those gained in humans when key  
265 environmental factors are modulated, such as by cessation of smoking<sup>44</sup>.  
266 Furthermore, long-term mortality benefits of early, transient mTor depletion appears  
267 to operate through different transcriptional changes compared to how mTor affects  
268 older animals, and the early impacts appear to involve alternative splicing. The long-  
269 lasting benefits from transient treatment could arise from metabolic or signalling  
270 reprogramming or hormesis<sup>45</sup>.

271

272 These novel insights will help inform future application and potential side effects of  
273 drugs targeting mTor. Future work will benefit from uncovering if tissue-specific  
274 effects of mTor signalling underlie these age-dependent dynamics and will also need  
275 to experimentally test which physiological mechanisms hypothesised from the  
276 transcriptome profiles cause the observed mortality differences. These mechanisms  
277 will be complex because our data suggest that reduced mTor throughout life  
278 probably affects a composite of two (or more) age-dependent processes.

## 279 **Methods**

### 280 **Fly husbandry and mortality measurement**

281 Flies were grown and kept on our standard rich diet (8% autolysed yeast, 13% table  
282 sugar, 6% cornmeal, 1% agar and nipagin 0.225% [w/v], with only growing bottles  
283 containing 0.4% [v/v] propanoic acid)<sup>14</sup>. Media for vials was cooked and then spilt to  
284 allow preparation of drug or control food from the same batch of fly food, controlling  
285 for variation in cooking batch. RU486 (Generon UK, dissolved in absolute ethanol at  
286 a stock solution of 10mg/ml) was added to the media, during cooling for dispensing  
287 into vials, to give a final concentration of 200 $\mu$ M in the fly food. An equal volume of  
288 absolute ethanol was added to the control food.

289  
290 Flies for experiments were grown in controlled density bottles by using a set amount  
291 of 10 virgins mated with males. Offspring of each cross was age standardised by  
292 transferring all newly eclosed adult flies each day to a new bottle (Flystuff square  
293 bottles) for two days of subsequent mating. After mating, flies were sorted into vials,  
294 using light CO<sub>2</sub> anaesthesia, of 25 females each and transferred the same day to a  
295 demography cage to contain 125 flies each (for a detailed description see<sup>14</sup>). The  
296 cage design<sup>12</sup> allows the removal of dead flies and changing of food, every other  
297 day, without physically transferring the flies, to allow for as little disturbance to them  
298 as possible. A low frequency of accidental deaths (stuck to the food or killed  
299 accidentally) and escapees were righthand censored in the analyses.

300

### 301 **Statistical analysis of mortality**

302 All mortality data was analysed using mixed effects cox-proportional hazard models  
303 using age-dependent covariates<sup>46</sup> to test for the age-dependent changes in mortality.  
304 These models are conservative as they correct for pseudoreplication cause by cage  
305 effects (similar to vial to vial error and critical in reducing type I error). Age-  
306 dependent covariates allow a comparison during specific ages, specifically relevant  
307 as the experimental design induced age-dependent modulation of mTor (Figure 1)<sup>14</sup>.  
308 Coefficients are reported in the text and are in comparison to the control treated flies.  
309 These coefficients are shown on the linear scale, with standard errors on the log-  
310 scale to maintain symmetric errors. Models also included transfer day in the model to  
311 correct for any variation between day or growing conditions (although omission of

312 this correction did not change any of the results). All experiments had a maximum of  
313 four transferring days into the cages and ages at RU486 treatment thus maximally  
314 differed 1-2 days around the mean age of induction. The x-axis, age, in the raw  
315 mortality graphs is corrected for such differences in transfer data as all flies (across  
316 all the data presented) were given RU486 on the same calendar date. In the graphs  
317 this allows an appreciation of the changes in mortality in response to RU486 timing.  
318 All analyses included actual non-corrected ages.

319

## 320 **Transcriptome**

321 RNA was extracted from a lysate (generated by bead milling) of ~4 whole flies per  
322 sample (4 flies per treatment per timepoint, total 32 samples) using a Qiagen  
323 RNeasy mini kit. Samples were shipped on dry ice to the Oxford Genomics Centre  
324 where samples were reverse transcribed and an equal concentration was polyA  
325 enriched library prepped and deep-sequenced in full multiplex using Illumina  
326 HiSeq4000 with 75bp paired ends. Average mapped reads across samples was 176  
327 million. Reads were mapped to the *Drosophila melanogaster* genome (Release 6)  
328 using annotated (and thus not *de novo* assembled) transcripts using *hisat2*<sup>47</sup>,  
329 formatted into read counts using *stringtie*<sup>47</sup> to be used in *ballgown*<sup>47</sup> in R, and  
330 analysed for differential expression using *edgeR* using the general linear modelling  
331 framework in *glmQLFit*. We used a full model design correcting for age-dependent  
332 changes of mTor knockdown to distil the effects of the timing regimes specifically at  
333 late age on the total transcriptome ( $y \sim \text{knockdown} * \text{timepoint} + \text{timing regime at old}$   
334  $\text{age}$ ). This statistical framework therefore identifies differential transcription specific  
335 to the timing regime by which mTor is conditionally knocked down compared to  
336 control conditions when mortality benefits were observed (Figure 3). Differential  
337 splicing was analysed using exon mapping and the function *diffSpliceDGE* from  
338 *edgeR*. KEGG and GO enrichments<sup>32</sup> were conducted using the *limma*<sup>48</sup> package in  
339 R. For plotting of the KEGG mTor pathway, the pathway was updated manually  
340 using the most recent fly literature for plotting purposes only (but not for enrichment  
341 analyses).

342 **Acknowledgements**

343 MJPS is supported by a Sir Henry Wellcome and a Sheffield Vice Chancellor's  
344 Fellowship, the Natural Environment Research Council (M005941 & N013832) and  
345 an Academy of Medical Sciences Springboard Award (the Wellcome Trust, the  
346 Government Department of Business, Energy and Industrial Strategy (BEIS), the  
347 British Heart Foundation and Diabetes UK). MT is supported by American Federation  
348 of Aging Research, Grant/Award Number: GR5290420; National Institute on Aging,  
349 Grant/Award Number:R37 AG024360, T32 AG 41688. ST was supported by the EU  
350 Erasmus exchange program with the VU University of Amsterdam. JT was supported  
351 by a summer stipend from the University of Oxford. We thank the Oxford Genomics  
352 Centre at the Wellcome Centre for Human Genetics (funded by Wellcome Trust  
353 grant reference 203141/Z/16/Z) for the generation and initial processing of  
354 sequencing data.

355 **References**

- 356 1. Tatar, M. The plate half-full: Status of research on the mechanisms of dietary  
357 restriction in *Drosophila melanogaster*. *Exp. Gerontol.* **46**, 363–368 (2011).
- 358 2. Fontana, L. & Partridge, L. Promoting health and longevity through diet: From  
359 model organisms to humans. *Cell* **161**, 106–118 (2015).
- 360 3. Simons, M. J. P., Koch, W. & Verhulst, S. Dietary restriction of rodents  
361 decreases aging rate without affecting initial mortality rate - a meta-analysis.  
362 *Aging Cell* **12**, 410–414 (2013).
- 363 4. Garratt, M., Nakagawa, S. & Simons, M. J. P. Comparative idiosyncrasies in  
364 life extension by reduced mTOR signalling and its distinctiveness from dietary  
365 restriction. *Aging Cell* **15**, (2016).
- 366 5. Swindell, W. R. Meta-Analysis of 29 Experiments Evaluating the Effects of  
367 Rapamycin on Life Span in the Laboratory Mouse. *Journals Gerontol. - Ser. A*  
368 *Biol. Sci. Med. Sci.* **72**, 1024–1032 (2017).
- 369 6. Johnson, S. C., Rabinovitch, P. S. & Kaeberlein, M. MTOR is a key modulator  
370 of ageing and age-related disease. *Nature* **493**, 338–345 (2013).
- 371 7. Partridge, L., Deelen, J. & Slagboom, P. E. Facing up to the global challenges  
372 of ageing. *Nature* **561**, 45–56 (2018).
- 373 8. Vaupel, J. W., Carey, J. R. & Christensen, K. It's never too late. *Science* **301**,  
374 1679–1681 (2003).
- 375 9. Harrison, D. E. *et al.* Rapamycin fed late in life extends lifespan in genetically  
376 heterogeneous mice. *Nature* **460**, 392–395 (2009).
- 377 10. Fontana, L. *et al.* Decreased Consumption of Branched-Chain Amino Acids  
378 Improves Metabolic Health. *Cell Rep.* **16**, 520–530 (2016).
- 379 11. Rizza, W., Veronese, N. & Fontana, L. What are the roles of calorie restriction  
380 and diet quality in promoting healthy longevity? *Ageing Res. Rev.* **13**, 38–45  
381 (2014).
- 382 12. Good, T. P. & Tatar, M. Age-specific mortality and reproduction respond to  
383 adult dietary restriction in *Drosophila melanogaster*. *J. Insect Physiol.* **47**,  
384 1467–1473 (2001).
- 385 13. Mair, W., Goymer, P., Pletcher, S. D. & Partridge, L. Demography of dietary  
386 restriction and death in *Drosophila*. *Science* **301**, 1731–3 (2003).
- 387 14. McCracken, A. W., Adams, G., Hartshorne, L. & Simons, M. J. P. The hidden  
388 costs of dietary restriction: implications for its evolutionary and mechanistic

- 389 origins. *bioRxiv Preprint*, doi:10.1101/533711 (2019).
- 390 15. Simons, M. J. P., Koch, W. & Verhulst, S. Dietary restriction of rodents  
391 decreases aging rate without affecting initial mortality rate - a meta-analysis.  
392 *Aging Cell* **12**, 410-414 (2013).
- 393 16. Merry, B. J. Dietary restriction in rodents - Delayed or retarded ageing? *Mech.*  
394 *Ageing Dev.* **126**, 951–959 (2005).
- 395 17. Sun, L., Sadighi Akha, A. A., Miller, R. A. & Harper, J. M. Life-span extension  
396 in mice by preweaning food restriction and by methionine restriction in middle  
397 age. *Journals Gerontol. - Ser. A Biol. Sci. Med. Sci.* **64**, 711–722 (2009).
- 398 18. Bitto, A. *et al.* Transient rapamycin treatment can increase lifespan and  
399 healthspan in middle-aged mice. *Elife* **5**, 1–17 (2016).
- 400 19. Garratt, M., Nakagawa, S. & Simons, M. J. P. Life-span Extension With  
401 Reduced Somatotrophic Signaling: Moderation of Aging Effect by Signal Type,  
402 Sex, and Experimental Cohort. *J. Gerontol. A. Biol. Sci. Med. Sci.* **72**, 1620–  
403 1626 (2017).
- 404 20. Pletcher, S. D. Model fitting and hypothesis testing for ages-specific mortality  
405 data. *J. Evol. Biol.* **12**, 430–439 (1999).
- 406 21. Partridge, L., Pletcher, S. D. & Mair, W. Dietary restriction, mortality  
407 trajectories, risk and damage. *Mech. Ageing Dev.* **126**, 35–41 (2005).
- 408 22. Ni, J. Q. *et al.* A genome-scale shRNA resource for transgenic RNAi in  
409 *Drosophila*. *Nat. Methods* **8**, 405–407 (2011).
- 410 23. Tricoire, H. *et al.* The steroid hormone receptor EcR finely modulates  
411 *Drosophila* lifespan during adulthood in a sex-specific manner. *Mech. Ageing*  
412 *Dev.* **130**, 547–552 (2009).
- 413 24. Osterwalder, T., Yoon, K. S., White, B. H. & Keshishian, H. A conditional  
414 tissue-specific transgene expression system using inducible GAL4. *Proc. Natl.*  
415 *Acad. Sci.* **98**, 12596–12601 (2001).
- 416 25. Schreiber, K. H. *et al.* A novel rapamycin analog is highly selective for  
417 mTORC1 in vivo. *Nat. Commun.* **10**, 3194 (2019).
- 418 26. Goyal, L., McCall, K., Agapite, J., Hartweg, E. & Steller, H. Induction of  
419 apoptosis by *Drosophila* reaper, hid and grim through inhibition of IAP function.  
420 *EMBO J.* **19**, 589–97 (2000).
- 421 27. Hwangbo, D. S., Garsham, B., Tu, M. P., Palmer, M. & Tatar, M. *Drosophila*  
422 dFOXO controls lifespan and regulates insulin signalling in brain and fat body.



- 423 *Nature* **429**, 562–566 (2004).
- 424 28. Giannakou, M. E. *et al.* Long-lived *Drosophila* with over-expressed dFOXO in  
425 adult fat body. *Science* **305**, 361 (2004).
- 426 29. Gorsky, M. K., Burnouf, S., Dols, J., Mandelkow, E. & Partridge, L. Acetylation  
427 mimic of lysine 280 exacerbates human Tau neurotoxicity in vivo. *Sci. Rep.* **6**,  
428 1–12 (2016).
- 429 30. Rera, M. *et al.* Modulation of longevity and tissue homeostasis by the  
430 *drosophila* PGC-1 homolog. *Cell Metab.* **14**, 623–634 (2011).
- 431 31. Therneau, T. M., Grambsch, P. M., Shane Pankratz, V. Penalized Survival  
432 Models and Frailty. *J. Comput. Graph. Stat.* **12**, 156–175 (2003).
- 433 32. Young, M. D., Wakefield, M. J., Smyth, G. K. & Oshlack, A. Gene ontology  
434 analysis for RNA-seq: accounting for selection bias. *Genome Biol.* **11**, R14  
435 (2010).
- 436 33. Zhao, J., Zhai, B., Gygi, S. P. & Goldberg, A. L. mTOR inhibition activates  
437 overall protein degradation by the ubiquitin proteasome system as well as by  
438 autophagy. *Proc. Natl. Acad. Sci.* **112**, 15790–15797 (2015).
- 439 34. Zhang, Y. *et al.* Coordinated regulation of protein synthesis and degradation by  
440 mTORC1. *Nature* **513**, 440–443 (2014).
- 441 35. Meshorer, E., Soreq, H., Meshorer, E. & Soreq, H. Pre-mRNA splicing  
442 modulations in senescence. *Aging Cell* **1**, 10-16 (2002).
- 443 36. Heintz, C. *et al.* Splicing factor 1 modulates dietary restriction and TORC1  
444 pathway longevity in *C. elegans*. *Nature* **541**, 102–106 (2017).
- 445 37. Tabrez, S. S., Sharma, R. D., Jain, V., Siddiqui, A. A. & Mukhopadhyay, A.  
446 Differential alternative splicing coupled to nonsense-mediated decay of mRNA  
447 ensures dietary restriction-induced longevity. *Nat. Commun.* **8**, 306 (2017).
- 448 38. Lee, G. *et al.* Post-transcriptional Regulation of De Novo Lipogenesis by  
449 mTORC1-S6K1-SRPK2 Signaling. *Cell* **171**, 1545-1558.e18 (2017).
- 450 39. Park, S.-K., Link, C. D. & Johnson, T. E. Life-span extension by dietary  
451 restriction is mediated by NLP-7 signaling and coelomocyte endocytosis in *C.*  
452 *elegans*. *FASEB J.* **24**, 383–392 (2010).
- 453 40. Bouska, M., Huang, K., Kang, P. & Bai, H. Organelle aging: Lessons from  
454 model organisms. *J. Genet. Genomics* **46**, 171–185 (2019).
- 455 41. Wilkinson, D. S. *et al.* Phosphorylation of LC3 by the Hippo Kinases  
456 STK3/STK4 Is Essential for Autophagy. *Mol. Cell* **57**, 55–68 (2015).

- 457 42. Lehtinen, M. K. *et al.* A conserved MST-FOXO signaling pathway mediates  
458 oxidative-stress responses and extends life span. *Cell* **125**, 987–1001 (2006).
- 459 43. Pleiss, J. A., Whitworth, G. B., Bergkessel, M. & Guthrie, C. Rapid, Transcript-  
460 Specific Changes in Splicing in Response to Environmental Stress. *Mol. Cell*  
461 **27**, 928–937 (2007).
- 462 44. Jacobs, D. R. Cigarette Smoking and Mortality Risk. *Arch. Intern. Med.* **159**,  
463 733 (1999).
- 464 45. Rattan, S. I. S. Hormesis in aging. *Ageing Res. Rev.* **7**, 63–78 (2008).
- 465 46. Therneau, T. & Atkinson, E. Using Time Dependent Covariates and Time  
466 Dependent Coefficients in the Cox Model Time dependent covariates. 1–24  
467 (2016).
- 468 47. Pertea, M., Kim, D., Pertea, G. M., Leek, J. T. & Salzberg, S. L. Transcript-  
469 level expression analysis of RNA-seq experiments with HISAT, StringTie and  
470 Ballgown. *Nat. Protoc.* **11**, (2016).
- 471 48. Ritchie, M. E. *et al.* limma powers differential expression analyses for RNA-  
472 sequencing and microarray studies. *Nucleic Acids Res.* **43**, e47–e47 (2015).
- 473

## Supplementary Figure S1

Differential expression of mTOR knockdown age-dependent regimes plotted on the wider KEGG mTor network (at late age). Intensity of greener colours indicate reduced transcription relative to control. Intensity of red colours indicate increased transcription relative to control. White boxes indicate genes for which there is no clear paralog in *Drosophila melanogaster*.

### A. Whole life knockdown

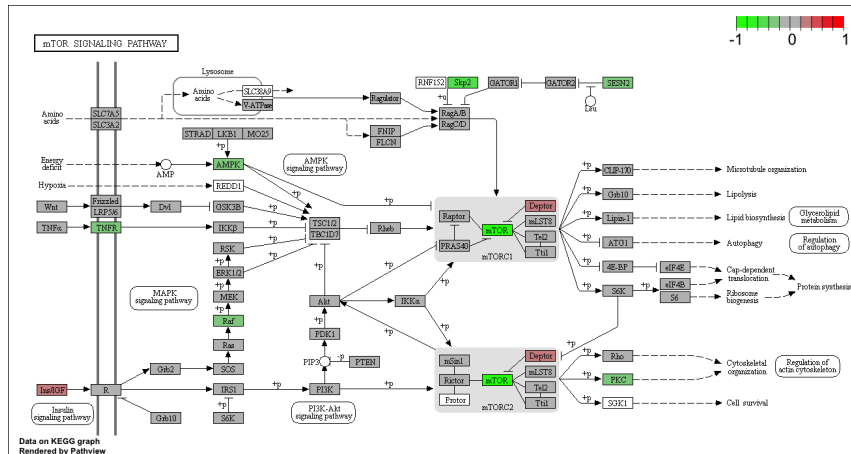

### B. Transient knockdown in early adult life

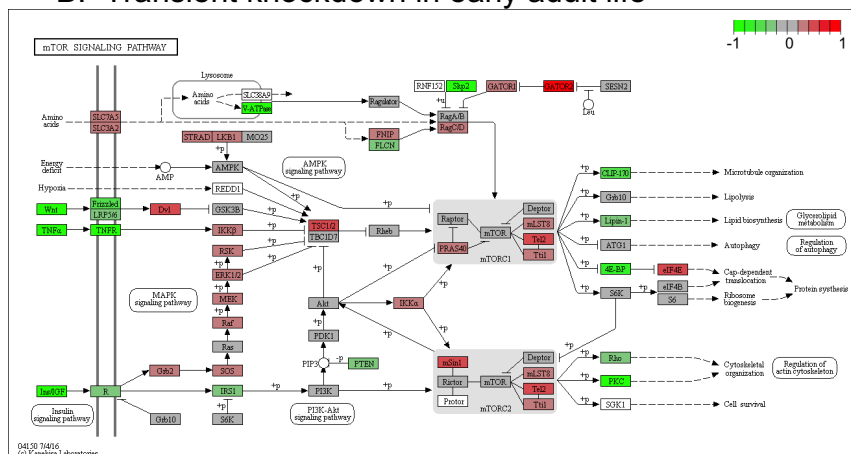

### C. Knockdown in late life only

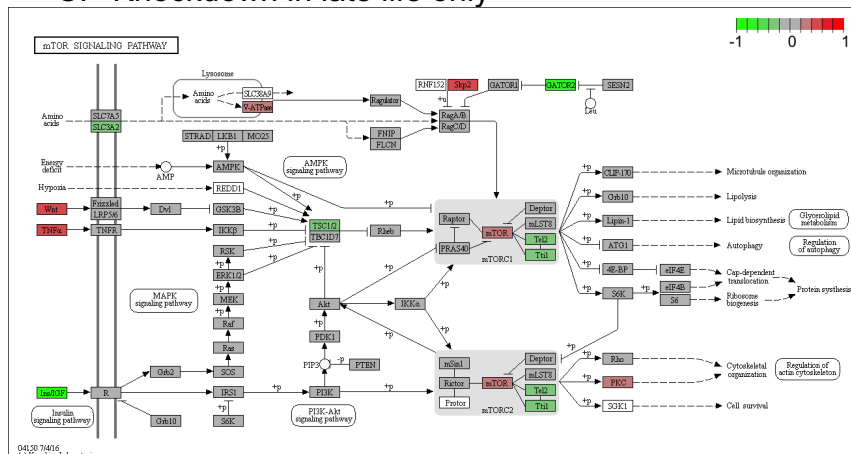

Table S1. KEGG analysis of transcriptome resulting from mTor knockdown

| Pathway                                     | N   | Up  | Down | P Up   | P Down |
|---------------------------------------------|-----|-----|------|--------|--------|
| Metabolic pathways                          | 912 | 172 | 86   | <0.001 | 0.996  |
| Galactose metabolism                        | 29  | 13  | 3    | <0.001 | 0.697  |
| Starch and sucrose metabolism               | 28  | 12  | 0    | <0.001 | 1      |
| Toll and Imd signaling pathway              | 63  | 20  | 6    | <0.001 | 0.788  |
| Carbon metabolism                           | 91  | 25  | 11   | <0.001 | 0.546  |
| Glycolysis / Gluconeogenesis                | 40  | 14  | 7    | <0.001 | 0.201  |
| Pentose and glucuronate interconversions    | 42  | 14  | 4    | 0.001  | 0.763  |
| Glycine, serine and threonine metabolism    | 25  | 10  | 1    | 0.001  | 0.96   |
| Pentose phosphate pathway                   | 19  | 8   | 2    | 0.002  | 0.687  |
| Drug metabolism - other enzymes             | 84  | 21  | 9    | 0.003  | 0.698  |
| Proteasome                                  | 38  | 0   | 33   | 1      | <0.001 |
| Protein processing in endoplasmic reticulum | 115 | 6   | 32   | 0.999  | <0.001 |
| DNA replication                             | 34  | 0   | 14   | 1      | <0.001 |
| mRNA surveillance pathway                   | 60  | 4   | 15   | 0.971  | 0.004  |
| Ubiquitin mediated proteolysis              | 84  | 4   | 19   | 0.998  | 0.005  |
| Synthesis and degradation of ketone bodies  | 7   | 0   | 4    | 1      | 0.005  |
| Mucin type O-glycan biosynthesis            | 15  | 1   | 6    | 0.888  | 0.006  |
| Nucleotide excision repair                  | 37  | 1   | 10   | 0.995  | 0.01   |
| RNA transport                               | 121 | 7   | 23   | 0.998  | 0.017  |
| Mismatch repair                             | 20  | 0   | 6    | 1      | 0.027  |

Table S2. KEGG analysis of transcriptome resulting from Early adult transient mTor knockdown

| Pathway                                 | N   | Up  | Down | P Up   | P Down |
|-----------------------------------------|-----|-----|------|--------|--------|
| Spliceosome                             | 115 | 84  | 8    | <0.001 | 1      |
| DNA replication                         | 34  | 33  | 1    | <0.001 | 1      |
| Nucleotide excision repair              | 37  | 35  | 1    | <0.001 | 1      |
| RNA transport                           | 121 | 81  | 4    | <0.001 | 1      |
| Basal transcription factors             | 37  | 33  | 1    | <0.001 | 1      |
| Fanconi anemia pathway                  | 26  | 24  | 0    | <0.001 | 1      |
| Mismatch repair                         | 20  | 19  | 1    | <0.001 | 1      |
| Homologous recombination                | 23  | 21  | 0    | <0.001 | 1      |
| Ubiquitin mediated proteolysis          | 84  | 54  | 4    | <0.001 | 1      |
| mRNA surveillance pathway               | 60  | 41  | 4    | <0.001 | 1      |
| Neuroactive ligand-receptor interaction | 42  | 0   | 37   | 1      | <0.001 |
| Biosynthesis of unsaturated fatty acids | 21  | 2   | 17   | 0.999  | <0.001 |
| Lysosome                                | 97  | 12  | 53   | 1      | <0.001 |
| ECM-receptor interaction                | 12  | 0   | 10   | 1      | 0.001  |
| Insect hormone biosynthesis             | 24  | 1   | 16   | 1      | 0.001  |
| Metabolic pathways                      | 912 | 227 | 348  | 1      | 0.001  |
| Fatty acid metabolism                   | 49  | 6   | 27   | 1      | 0.001  |
| Ascorbate and aldarate metabolism       | 27  | 3   | 17   | 0.999  | 0.002  |
| Glycerolipid metabolism                 | 39  | 7   | 22   | 0.995  | 0.003  |
| Caffeine metabolism                     | 5   | 0   | 5    | 1      | 0.004  |

Table S3. KEGG analysis of transcriptome resulting from Late adult mTor knockdown

| Pathway                                         | N   | Up | Down | P Up         | P Down           |
|-------------------------------------------------|-----|----|------|--------------|------------------|
| Folate biosynthesis                             | 34  | 5  | 0    | <b>0.001</b> | 1                |
| Thiamine metabolism                             | 16  | 3  | 0    | <b>0.006</b> | 1                |
| ABC transporters                                | 19  | 3  | 0    | <b>0.01</b>  | 1                |
| Arginine biosynthesis                           | 13  | 2  | 0    | <b>0.037</b> | 1                |
| Fatty acid elongation                           | 13  | 2  | 0    | <b>0.037</b> | 1                |
| 2-Oxocarboxylic acid metabolism                 | 14  | 2  | 1    | <b>0.042</b> | 0.49             |
| Amino sugar and nucleotide sugar metabolism     | 40  | 3  | 2    | 0.068        | 0.567            |
| Biosynthesis of unsaturated fatty acids         | 21  | 2  | 0    | 0.087        | 1                |
| Longevity regulating pathway - multiple species | 47  | 3  | 0    | 0.099        | 1                |
| Caffeine metabolism                             | 5   | 1  | 0    | 0.113        | 1                |
| Ribosome biogenesis in eukaryotes               | 72  | 0  | 18   | 1            | <b>&lt;0.001</b> |
| Aminoacyl-tRNA biosynthesis                     | 41  | 0  | 10   | 1            | <b>&lt;0.001</b> |
| RNA polymerase                                  | 28  | 0  | 7    | 1            | <b>&lt;0.001</b> |
| Spliceosome                                     | 115 | 2  | 15   | 0.76         | <b>&lt;0.001</b> |
| Pentose phosphate pathway                       | 19  | 0  | 4    | 1            | <b>0.011</b>     |
| RNA transport                                   | 121 | 0  | 12   | 1            | <b>0.011</b>     |
| Homologous recombination                        | 23  | 0  | 4    | 1            | <b>0.021</b>     |
| Glycine, serine and threonine metabolism        | 25  | 1  | 4    | 0.451        | <b>0.028</b>     |
| Non-homologous end-joining                      | 6   | 0  | 2    | 1            | <b>0.029</b>     |
| Fanconi anemia pathway                          | 26  | 0  | 4    | 1            | <b>0.032</b>     |

Table S4. GO analysis of transcriptome resulting from mTor knockdown

| Term                                                              | N    | Up  | Down | P Up   | P Down |
|-------------------------------------------------------------------|------|-----|------|--------|--------|
| <b>Biological Process</b>                                         |      |     |      |        |        |
| response to biotic stimulus                                       | 329  | 102 | 43   | <0.001 | 0.307  |
| response to external biotic stimulus                              | 329  | 102 | 43   | <0.001 | 0.307  |
| response to other organism                                        | 329  | 102 | 43   | <0.001 | 0.307  |
| response to bacterium                                             | 211  | 76  | 23   | <0.001 | 0.73   |
| ubiquitin-dependent protein catabolic process                     | 229  | 15  | 73   | 1      | <0.001 |
| protein catabolic process                                         | 291  | 19  | 85   | 1      | <0.001 |
| modification-dependent macromolecule catabolic process            | 241  | 17  | 75   | 1      | <0.001 |
| eggshell formation                                                | 118  | 13  | 48   | 0.826  | <0.001 |
| modification-dependent protein catabolic process                  | 235  | 16  | 73   | 1      | <0.001 |
| chorion-containing eggshell formation                             | 116  | 13  | 47   | 0.808  | <0.001 |
| defense response                                                  | 358  | 103 | 47   | <0.001 | 0.286  |
| proteolysis involved in cellular protein catabolic process        | 263  | 19  | 77   | 1      | <0.001 |
| proteasome-mediated ubiquitin-dependent protein catabolic process | 179  | 13  | 60   | 0.997  | <0.001 |
| proteolysis                                                       | 665  | 112 | 147  | 0.007  | <0.001 |
| cellular protein catabolic process                                | 265  | 19  | 77   | 1      | <0.001 |
| defense response to other organism                                | 247  | 78  | 32   | <0.001 | 0.359  |
| macromolecule catabolic process                                   | 447  | 41  | 109  | 0.998  | <0.001 |
| female gamete generation                                          | 676  | 49  | 147  | 1      | <0.001 |
| proteasomal protein catabolic process                             | 191  | 14  | 61   | 0.998  | <0.001 |
| cellular macromolecule catabolic process                          | 377  | 30  | 95   | 1      | <0.001 |
| <b>Molecular Function</b>                                         |      |     |      |        |        |
| threonine-type endopeptidase activity                             | 16   | 0   | 14   | 1      | <0.001 |
| threonine-type peptidase activity                                 | 16   | 0   | 14   | 1      | <0.001 |
| peptidase activity, acting on L-amino acid peptides               | 385  | 78  | 90   | <0.001 | <0.001 |
| peptidase activity                                                | 395  | 79  | 90   | <0.001 | <0.001 |
| endopeptidase inhibitor activity                                  | 48   | 24  | 3    | <0.001 | 0.94   |
| endopeptidase regulator activity                                  | 50   | 24  | 4    | <0.001 | 0.869  |
| serine-type endopeptidase inhibitor activity                      | 34   | 19  | 3    | <0.001 | 0.795  |
| peptidase inhibitor activity                                      | 51   | 24  | 4    | <0.001 | 0.878  |
| peptidase regulator activity                                      | 59   | 25  | 6    | <0.001 | 0.731  |
| endopeptidase activity                                            | 259  | 62  | 61   | <0.001 | <0.001 |
| catalytic activity, acting on a protein                           | 1093 | 143 | 185  | 0.696  | <0.001 |
| DNA replication origin binding                                    | 8    | 0   | 7    | 1      | <0.001 |
| hydrolase activity                                                | 1465 | 230 | 231  | 0.006  | <0.001 |
| 3'-5' DNA helicase activity                                       | 17   | 0   | 10   | 1      | <0.001 |
| enzyme inhibitor activity                                         | 79   | 26  | 4    | <0.001 | 0.99   |
| oxidoreductase activity                                           | 506  | 103 | 46   | <0.001 | 0.987  |
| proteasome-activating ATPase activity                             | 7    | 0   | 6    | 1      | <0.001 |
| thiol-dependent ubiquitin-specific protease activity              | 35   | 3   | 14   | 0.871  | <0.001 |
| thiol-dependent ubiquitinyl hydrolase activity                    | 35   | 3   | 14   | 0.871  | <0.001 |
| ubiquitinyl hydrolase activity                                    | 35   | 3   | 14   | 0.871  | <0.001 |
| <b>Cellular Component</b>                                         |      |     |      |        |        |
| endopeptidase complex                                             | 47   | 0   | 37   | 1      | <0.001 |
| proteasome complex                                                | 47   | 0   | 37   | 1      | <0.001 |
| peptidase complex                                                 | 73   | 1   | 45   | 1      | <0.001 |
| extracellular region                                              | 635  | 171 | 78   | <0.001 | 0.447  |
| external encapsulating structure                                  | 43   | 1   | 29   | 0.998  | <0.001 |
| chorion                                                           | 38   | 0   | 26   | 1      | <0.001 |
| proteasome regulatory particle                                    | 23   | 0   | 19   | 1      | <0.001 |
| proteasome accessory complex                                      | 24   | 0   | 19   | 1      | <0.001 |
| proteasome core complex                                           | 15   | 0   | 14   | 1      | <0.001 |
| extracellular space                                               | 351  | 96  | 48   | <0.001 | 0.192  |
| nucleus                                                           | 2236 | 176 | 357  | 1      | <0.001 |
| extracellular region part                                         | 441  | 106 | 60   | <0.001 | 0.171  |
| protein-containing complex                                        | 2320 | 160 | 361  | 1      | <0.001 |
| proteasome core complex, alpha-subunit complex                    | 8    | 0   | 8    | 1      | <0.001 |
| proteasome regulatory particle, lid subcomplex                    | 10   | 0   | 9    | 1      | <0.001 |
| cell                                                              | 6094 | 635 | 817  | 1      | <0.001 |
| cell part                                                         | 6094 | 635 | 817  | 1      | <0.001 |
| cytosolic proteasome complex                                      | 9    | 0   | 8    | 1      | <0.001 |
| proteasome regulatory particle, base subcomplex                   | 12   | 0   | 9    | 1      | <0.001 |
| microtubule cytoskeleton                                          | 244  | 19  | 56   | 0.998  | <0.001 |

Table S5. GO analysis of transcriptome resulting from Early adult transient mTor knockdown

| Term                                                          | N    | Up   | Down | P Up   | P Down |
|---------------------------------------------------------------|------|------|------|--------|--------|
| <b>Biological Process</b>                                     |      |      |      |        |        |
| nucleic acid metabolic process                                | 1858 | 1107 | 259  | <0.001 | 1      |
| cellular macromolecule metabolic process                      | 2860 | 1519 | 499  | <0.001 | 1      |
| macromolecule metabolic process                               | 3655 | 1815 | 770  | <0.001 | 1      |
| nucleobase-containing compound metabolic process              | 2131 | 1161 | 359  | <0.001 | 1      |
| RNA metabolic process                                         | 1656 | 952  | 252  | <0.001 | 1      |
| heterocycle metabolic process                                 | 2202 | 1184 | 385  | <0.001 | 1      |
| cellular aromatic compound metabolic process                  | 2259 | 1196 | 414  | <0.001 | 1      |
| cellular metabolic process                                    | 4287 | 1973 | 964  | <0.001 | 1      |
| organic cyclic compound metabolic process                     | 2309 | 1210 | 432  | <0.001 | 1      |
| gene expression                                               | 2035 | 1096 | 308  | <0.001 | 1      |
| cellular process                                              | 6226 | 2636 | 1688 | <0.001 | 1      |
| cellular nitrogen compound metabolic process                  | 2586 | 1317 | 450  | <0.001 | 1      |
| nitrogen compound metabolic process                           | 4076 | 1885 | 957  | <0.001 | 1      |
| primary metabolic process                                     | 4262 | 1926 | 1012 | <0.001 | 1      |
| chromosome organization                                       | 567  | 401  | 32   | <0.001 | 1      |
| regulation of macromolecule metabolic process                 | 1685 | 907  | 346  | <0.001 | 1      |
| regulation of metabolic process                               | 1814 | 954  | 381  | <0.001 | 1      |
| regulation of nitrogen compound metabolic process             | 1591 | 859  | 335  | <0.001 | 1      |
| cell cycle                                                    | 720  | 465  | 68   | <0.001 | 1      |
| regulation of primary metabolic process                       | 1607 | 864  | 338  | <0.001 | 1      |
| <b>Molecular Function</b>                                     |      |      |      |        |        |
| nucleic acid binding                                          | 1464 | 812  | 222  | <0.001 | 1      |
| binding                                                       | 4407 | 1894 | 1219 | <0.001 | 1      |
| heterocyclic compound binding                                 | 2319 | 1100 | 521  | <0.001 | 1      |
| organic cyclic compound binding                               | 2335 | 1101 | 533  | <0.001 | 1      |
| DNA binding                                                   | 717  | 421  | 152  | <0.001 | 1      |
| transmembrane transporter activity                            | 530  | 63   | 313  | 1      | <0.001 |
| inorganic molecular entity transmembrane transporter activity | 378  | 35   | 237  | 1      | <0.001 |
| protein binding                                               | 2023 | 930  | 535  | <0.001 | 1      |
| molecular transducer activity                                 | 208  | 18   | 147  | 1      | <0.001 |
| signaling receptor activity                                   | 208  | 18   | 147  | 1      | <0.001 |
| ion transmembrane transporter activity                        | 393  | 42   | 235  | 1      | <0.001 |
| transporter activity                                          | 623  | 109  | 333  | 1      | <0.001 |
| transcription factor activity, protein binding                | 180  | 129  | 19   | <0.001 | 1      |
| transmembrane signaling receptor activity                     | 169  | 14   | 120  | 1      | <0.001 |
| chromatin binding                                             | 186  | 131  | 17   | <0.001 | 1      |
| transcription factor activity, transcription factor binding   | 166  | 116  | 19   | <0.001 | 1      |
| channel activity                                              | 147  | 12   | 103  | 1      | <0.001 |
| passive transmembrane transporter activity                    | 147  | 12   | 103  | 1      | <0.001 |
| G-protein coupled receptor activity                           | 82   | 2    | 67   | 1      | <0.001 |
| cation transmembrane transporter activity                     | 267  | 28   | 160  | 1      | <0.001 |
| <b>Cellular Component</b>                                     |      |      |      |        |        |
| nucleus                                                       | 2236 | 1370 | 291  | <0.001 | 1      |
| intracellular part                                            | 5305 | 2521 | 1090 | <0.001 | 1      |
| intracellular                                                 | 5350 | 2534 | 1109 | <0.001 | 1      |
| intracellular membrane-bounded organelle                      | 3636 | 1870 | 632  | <0.001 | 1      |
| intracellular organelle                                       | 4273 | 2102 | 811  | <0.001 | 1      |
| organelle                                                     | 4328 | 2115 | 837  | <0.001 | 1      |
| membrane-bounded organelle                                    | 3844 | 1933 | 709  | <0.001 | 1      |
| nuclear part                                                  | 1154 | 781  | 58   | <0.001 | 1      |
| intracellular organelle part                                  | 2481 | 1317 | 319  | <0.001 | 1      |
| cell                                                          | 6094 | 2628 | 1562 | <0.001 | 1      |
| cell part                                                     | 6094 | 2628 | 1562 | <0.001 | 1      |
| organelle part                                                | 2542 | 1327 | 352  | <0.001 | 1      |
| protein-containing complex                                    | 2320 | 1232 | 333  | <0.001 | 1      |
| intracellular organelle lumen                                 | 1012 | 631  | 57   | <0.001 | 1      |
| membrane-enclosed lumen                                       | 1012 | 631  | 57   | <0.001 | 1      |
| organelle lumen                                               | 1012 | 631  | 57   | <0.001 | 1      |
| nuclear lumen                                                 | 827  | 539  | 43   | <0.001 | 1      |
| chromosome                                                    | 521  | 370  | 31   | <0.001 | 1      |
| intrinsic component of plasma membrane                        | 446  | 42   | 322  | 1      | <0.001 |
| integral component of plasma membrane                         | 433  | 39   | 315  | 1      | <0.001 |

Table S6. GO analysis of transcriptome resulting from Late adult mTor knockdown

| Term                                                                | N    | Up  | Down | P Up   | P Down |
|---------------------------------------------------------------------|------|-----|------|--------|--------|
| <b>Biological Process</b>                                           |      |     |      |        |        |
| ncRNA metabolic process                                             | 321  | 0   | 67   | 1      | <0.001 |
| gene expression                                                     | 2035 | 9   | 192  | 1      | <0.001 |
| RNA metabolic process                                               | 1656 | 8   | 166  | 1      | <0.001 |
| nucleic acid metabolic process                                      | 1858 | 9   | 178  | 1      | <0.001 |
| ncRNA processing                                                    | 245  | 0   | 55   | 1      | <0.001 |
| RNA processing                                                      | 569  | 0   | 86   | 1      | <0.001 |
| cellular nitrogen compound metabolic process                        | 2586 | 18  | 216  | 1      | <0.001 |
| nucleobase-containing compound metabolic process                    | 2131 | 17  | 187  | 1      | <0.001 |
| heterocycle metabolic process                                       | 2202 | 18  | 189  | 1      | <0.001 |
| organic cyclic compound metabolic process                           | 2309 | 23  | 193  | 1      | <0.001 |
| cellular aromatic compound metabolic process                        | 2259 | 21  | 189  | 1      | <0.001 |
| transmembrane transport                                             | 487  | 47  | 10   | <0.001 | 0.999  |
| ribosome biogenesis                                                 | 212  | 0   | 43   | 1      | <0.001 |
| rRNA metabolic process                                              | 151  | 0   | 36   | 1      | <0.001 |
| ribonucleoprotein complex biogenesis                                | 293  | 1   | 50   | 0.999  | <0.001 |
| macromolecule metabolic process                                     | 3655 | 45  | 255  | 1      | <0.001 |
| rRNA processing                                                     | 141  | 0   | 34   | 1      | <0.001 |
| nitrogen compound metabolic process                                 | 4076 | 60  | 270  | 1      | <0.001 |
| primary metabolic process                                           | 4262 | 60  | 278  | 1      | <0.001 |
| tRNA metabolic process                                              | 131  | 0   | 29   | 1      | <0.001 |
| <b>Molecular Function</b>                                           |      |     |      |        |        |
| catalytic activity, acting on RNA                                   | 246  | 0   | 50   | 1      | <0.001 |
| RNA binding                                                         | 582  | 0   | 79   | 1      | <0.001 |
| nucleic acid binding                                                | 1464 | 5   | 140  | 1      | <0.001 |
| heterocyclic compound binding                                       | 2319 | 27  | 187  | 1      | <0.001 |
| organic cyclic compound binding                                     | 2335 | 28  | 187  | 1      | <0.001 |
| transmembrane transporter activity                                  | 530  | 46  | 11   | <0.001 | 1      |
| secondary active transmembrane transporter activity                 | 124  | 23  | 1    | <0.001 | 0.998  |
| transporter activity                                                | 623  | 46  | 19   | <0.001 | 0.986  |
| active transmembrane transporter activity                           | 229  | 27  | 5    | <0.001 | 0.985  |
| organic anion transmembrane transporter activity                    | 126  | 20  | 0    | <0.001 | 1      |
| anion transmembrane transporter activity                            | 157  | 21  | 1    | <0.001 | 0.999  |
| sodium-independent organic anion transmembrane transporter activity | 27   | 10  | 0    | <0.001 | 1      |
| ion transmembrane transporter activity                              | 393  | 32  | 3    | <0.001 | 1      |
| catalytic activity, acting on a tRNA                                | 90   | 0   | 20   | 1      | <0.001 |
| helicase activity                                                   | 93   | 0   | 20   | 1      | <0.001 |
| chitin binding                                                      | 62   | 12  | 1    | <0.001 | 0.95   |
| inorganic molecular entity transmembrane transporter activity       | 378  | 29  | 4    | <0.001 | 1      |
| ATP-dependent helicase activity                                     | 71   | 0   | 16   | 1      | <0.001 |
| purine NTP-dependent helicase activity                              | 71   | 0   | 16   | 1      | <0.001 |
| catalytic activity                                                  | 3401 | 85  | 211  | 0.284  | <0.001 |
| <b>Cellular Component</b>                                           |      |     |      |        |        |
| nuclear part                                                        | 1154 | 2   | 116  | 1      | <0.001 |
| nucleus                                                             | 2236 | 10  | 180  | 1      | <0.001 |
| intracellular                                                       | 5350 | 71  | 330  | 1      | <0.001 |
| intracellular part                                                  | 5305 | 71  | 328  | 1      | <0.001 |
| intracellular organelle lumen                                       | 1012 | 2   | 98   | 1      | <0.001 |
| membrane-enclosed lumen                                             | 1012 | 2   | 98   | 1      | <0.001 |
| organelle lumen                                                     | 1012 | 2   | 98   | 1      | <0.001 |
| intracellular membrane-bounded organelle                            | 3636 | 35  | 244  | 1      | <0.001 |
| nucleolus                                                           | 209  | 0   | 36   | 1      | <0.001 |
| nuclear lumen                                                       | 827  | 2   | 82   | 1      | <0.001 |
| membrane-bounded organelle                                          | 3844 | 37  | 246  | 1      | <0.001 |
| preribosome                                                         | 72   | 0   | 19   | 1      | <0.001 |
| ribonucleoprotein complex                                           | 570  | 0   | 61   | 1      | <0.001 |
| integral component of membrane                                      | 1057 | 55  | 17   | <0.001 | 1      |
| protein-containing complex                                          | 2320 | 17  | 161  | 1      | <0.001 |
| intrinsic component of membrane                                     | 1077 | 55  | 17   | <0.001 | 1      |
| cell                                                                | 6094 | 113 | 342  | 1      | <0.001 |
| cell part                                                           | 6094 | 113 | 342  | 1      | <0.001 |
| integral component of plasma membrane                               | 433  | 31  | 3    | <0.001 | 1      |
| aminoacyl-tRNA synthetase multienzyme complex                       | 10   | 0   | 7    | 1      | <0.001 |



Table S7. KEGG analysis of alternative splicing at old age induced by transient mTor knockdown

| Pathway                        | N   | Differentially expressed | P Enrichment |
|--------------------------------|-----|--------------------------|--------------|
| Endocytosis                    | 122 | 11                       | <b>0.002</b> |
| Hippo signaling pathway - fly  | 61  | 6                        | <b>0.013</b> |
| Glycerophospholipid metabolism | 63  | 6                        | <b>0.015</b> |
| mTOR signaling pathway         | 96  | 7                        | <b>0.035</b> |
| Lysosome                       | 118 | 8                        | <b>0.036</b> |
